# Supplementary material for: Ionic-liquid-based synthesis of tellurium–rhenium carbonyls with specific reaction control
Source: Royal Society of Chemistry journal article supplement (doi:10.1039/c9dt01897b), 2019-01-01
Supplement: c9dt01897b1.pdf [file c9dt01897b1.pdf]

# **Ionic-Liquid-Based Synthesis of Tellurium-Rhenium Carbonyls with Specific Reaction Control**

**Silke Wolf<sup>a</sup>, Claus Feldmann<sup>a,\*</sup>**

<sup>a</sup> *Institut für Anorganische Chemie, Karlsruhe Institute of Technology (KIT),  
Engesserstrasse 15, D-76131 Karlsruhe, Germany  
\*claus.feldmann@kit.edu*

## **Supplementary Information**

### **Content**

**Structure analysis of  $[\{\text{Re}(\text{CO})_5\}_2\text{I}][\text{Al}_2\text{Cl}_7]$**

### Structure analysis of $[\{\text{Re}(\text{CO})_5\}_2\text{I}][\text{Al}_2\text{Cl}_7]$

$[\{\text{Re}(\text{CO})_5\}_2\text{I}][\text{Al}_2\text{Cl}_7]$  was obtained with yellow needles as by-phase of  $[\text{TeI}_2\text{Re}(\text{CO})_5][\text{AlCl}_4]$  (**1**) (see main paper). The presence of  $[\{\text{Re}(\text{CO})_5\}_2\text{I}][\text{Al}_2\text{Cl}_7]$  was validated by crystal structure analysis. Cation and anion are well-known individually in the literature (e.g.,  $[\{\text{Re}(\text{CO})_5\}_2\text{I}]^+$  in  $[\{\text{Re}(\text{CO})_5\}_2\text{I}][\text{AsF}_6]$ , see main paper). Here, the compound was only identified to complete and understand the underlying synthesis of the title compound **1**. Therefore, the structural data of  $[\{\text{Re}(\text{CO})_5\}_2\text{I}][\text{Al}_2\text{Cl}_7]$  are briefly summarized but not discussed in detail. The crystallographic data are shown in Table S1, unit cell and structure of cation are illustrated in Figures S1 and S2).

**Table S1.** Crystallographic data of  $[\{\text{Re}(\text{CO})_5\}_2\text{I}][\text{Al}_2\text{Cl}_7]$ .

| Compound                                 | $[\{\text{Re}(\text{CO})_5\}_2\text{I}][\text{Al}_2\text{Cl}_7]$                                                                       |
|------------------------------------------|----------------------------------------------------------------------------------------------------------------------------------------|
| Sum formula                              | $\text{C}_{10}\text{O}_{10}\text{Cl}_7\text{I}_1\text{Al}_2\text{Re}_2$                                                                |
| Formula weight                           | 1081.51 g mol <sup>-1</sup>                                                                                                            |
| Crystal system / space group             | monoclinic / $P2_1/n$                                                                                                                  |
| Lattice parameters                       | $a = 1094.8(2)$ pm<br>$b = 1181.7(2)$ pm<br>$c = 1268.7(5)$ pm<br>$\beta = 125.4(1)^\circ$<br>$V = 1338.0 \times 10^6$ pm <sup>3</sup> |
| Formula units per cell, Z                | 2                                                                                                                                      |
| Density (calculated)                     | 2.684 g cm <sup>-3</sup>                                                                                                               |
| Absorption correction                    | numerical                                                                                                                              |
| Absorption coefficient                   | 10.998 mm <sup>-1</sup>                                                                                                                |
| Measurement conditions                   | Stoe IPDS II diffractometer (Stoe)<br>$\lambda(\text{Mo-K}\alpha) = 71.073$ pm, (T = 200 K)                                            |
| Measurement limits                       | $-14 \leq h < 15$ ; $-16 \leq k \leq 14$ ; $-17 \leq l \leq 15$ ,<br>$2\theta_{\text{max}} = 29.21^\circ$                              |
| Number of reflections                    | 13039 (11045 independent)                                                                                                              |
| Refinement method                        | Full-matrix least-squares on F <sup>2</sup>                                                                                            |
| Merging                                  | $R_{\text{int}} = 0.081$                                                                                                               |
| Total number of least squares parameters | 146                                                                                                                                    |
| Largest diff. peak and hole              | 2.65/ $-2.68e \times 10^{-6}$ pm <sup>3</sup>                                                                                          |
| Figures of merit                         | $RI = 0.033$ [ $F_o > 4\sigma(F_o)$ ]<br>$RI$ (all data) = 0.045<br>$wR2 = 0.074$<br>$\text{Goof} = 0.985$                             |

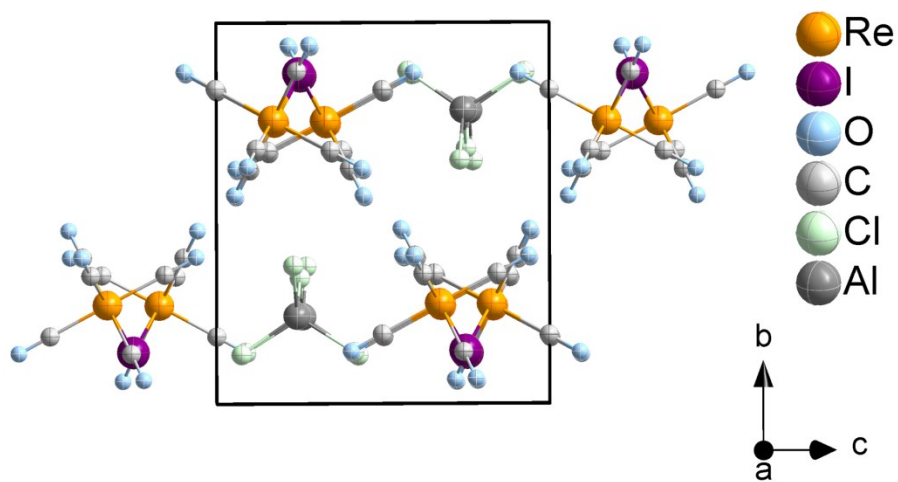

**Figure S1.** Unit cell of  $[\{\text{Re}(\text{CO})_5\}_2\text{I}][\text{Al}_2\text{Cl}_7]$ .

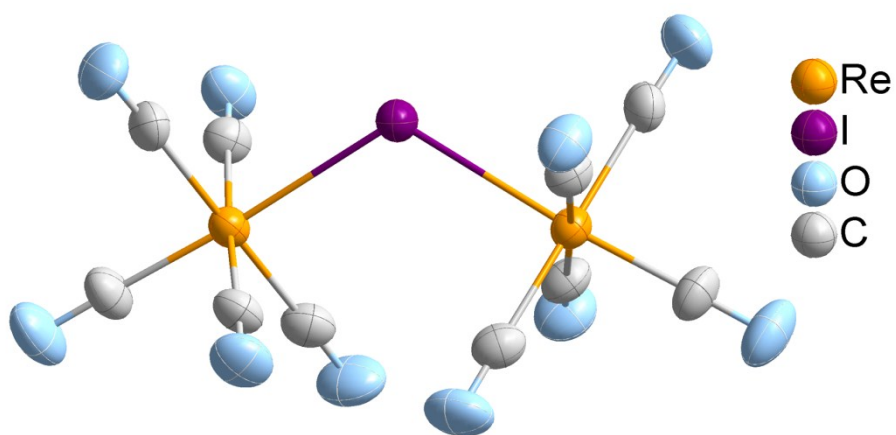

**Figure S2.** Structure of the  $[\{\text{Re}(\text{CO})_5\}_2\text{I}]^+$  cation in  $[\{\text{Re}(\text{CO})_5\}_2\text{I}][\text{Al}_2\text{Cl}_7]$ .
